# Supplementary material for: Optimized Illumina PCR-free library preparation for bacterial whole genome sequencing and analysis of factors influencing de novo assembly
Source: PubMed Central journal article supplement (PMC4864918; doi:10.1186/s13104-016-2072-9), 2016-05-12
Supplement: 13104_2016_2072_MOESM1_ESM.pdf [file 13104_2016_2072_MOESM1_ESM.pdf]

## Additional file 1

**Table S1 – Applied RB:BB ratios during first size selection**

| STEP | ACTION                                                           | INFORMATION                                  | LIBRARY CATEGORY       |                        |                        |                        |
|------|------------------------------------------------------------------|----------------------------------------------|------------------------|------------------------|------------------------|------------------------|
|      |                                                                  |                                              | IS1                    | IS2                    | IS3                    | IS4                    |
| 1    | Take 50 µl fragmented DNA                                        | <i>DNA is dissolved in RB</i>                | 50.0                   | 50.0                   | 50.0                   | 50.0                   |
| 2    | Add RB                                                           |                                              | + 30.0                 | + 38.0                 | + 42.0                 | + 46.0                 |
|      |                                                                  | <i>Volume of RB after step 2</i>             | <b>80.0</b>            | <b>88.0</b>            | <b>92.0</b>            | <b>96.0</b>            |
| 3    | Add 1X Beads                                                     |                                              | + 40.0                 | + 40.0                 | + 40.0                 | + 40.0                 |
|      |                                                                  | <i>Total volume (RB and BB) after step 3</i> | <b>120.0</b>           | <b>128.0</b>           | <b>132.0</b>           | <b>136.0</b>           |
|      |                                                                  | <i>RB:BB ratio by volume</i>                 | 80.0:40.0 (2.0:1.0)    | 88.0:40.0 (2.2:1.0)    | 92.0:40.0 (2.3:1.0)    | 96.0:40.0 (2.4:1.0)    |
| 4    | Take supernatant                                                 |                                              | 117.0                  | 125.0                  | 129.0                  | 133.0                  |
| 5    | Add RB                                                           |                                              | + 70.2                 | + 78.3                 | + 82.1                 | +86.0                  |
| 6    | Add 2X Beads                                                     |                                              | + 39.0                 | + 39.1                 | + 39.1                 | + 39.1                 |
|      |                                                                  | <i>Total volume (RB and BB) after step 6</i> | <b>226.2</b>           | <b>242.4</b>           | <b>250.2</b>           | <b>258.1</b>           |
|      |                                                                  | <i>RB:BB ratio by volume</i>                 | 148.2:78.0 (~ 3.8:2.0) | 164.2:78.2 (~ 4.2:2.0) | 172.0:78.2 (~ 4.4:2.0) | 179.9:78.2 (~ 4.6:2.0) |
| 7    | Take Bead pellet and proceed as described in Materials & Methods |                                              | ...                    | ...                    | ...                    | ...                    |

Color scheme:

**Blue** - Volumes in µl of Resuspension Buffer (RB) from the Illumina TruSeq® DNA PCR-free Sample Preparation Kit.

**Red** - Volumes in µl of Bead Buffer (BB) containing 1X or 2X concentrated magnetic bead particles of the Agencourt AMPure® XP Kit.

**Magenta** - Volumes in µl of mixtures containing RB and BB.

Gray shaded lines - Information about volumes of mixtures containing RB and BB together with their underlying RB:BB ratios in black parentheses.

**Table S2 – Applied RB:BB ratios during second size selection**

| STEP | ACTION                          | INFORMATION                      | LIBRARY CATEGORY |             |             |             |
|------|---------------------------------|----------------------------------|------------------|-------------|-------------|-------------|
|      |                                 |                                  | IS1              | IS2         | IS3         | IS4         |
| 1    | Take 70 µl end-repaired DNA     | <i>DNA is dissolved in RB</i>    | 70.0             | 70.0        | 70.0        | 70.0        |
| 2    | Add RB                          |                                  | + 10.0           | + 18.0      | + 22.0      | + 26.0      |
|      |                                 | <i>Volume of RB after step 2</i> | <b>80.0</b>      | <b>88.0</b> | <b>92.0</b> | <b>96.0</b> |
| 3    | Proceed with step 3 of Table S1 |                                  | ...              | ...         | ...         | ...         |

Color scheme:

Blue - Volumes in µl of Resuspension Buffer (RB) from the Illumina TruSeq® DNA PCR-free Sample Preparation Kit.

**Table S3 - Average insert sizes of sequenced libraries**

| library sequenced*     | average insert size** in bps |                       | % overestimation of Bioanalyzer |
|------------------------|------------------------------|-----------------------|---------------------------------|
|                        | Bioanalyzer                  | raw read remapping*** |                                 |
| Efa_IS1                | 704                          | 674                   | 4.45                            |
| Mlu_IS1                | 719                          | 675                   | 6.52                            |
| Bce_IS1                | 732                          | 669                   | 9.42                            |
| Pst_IS1                | 819                          | 714                   | 14.71                           |
| Sen_IS1                | 886                          | 726                   | 22.04                           |
| Efa_IS2                | 1,105                        | 918                   | 20.37                           |
| Sen_IS2                | 1,376                        | 978                   | 40.70                           |
| Mlu <sub>50</sub> _IS2 | 1,408                        | 1,074                 | 31.10                           |
| Bce_IS3                | 1,602                        | 1,094                 | 46.44                           |
| Mlu_IS3                | 1,707                        | 1,255                 | 36.02                           |
| Mlu <sub>50</sub> _IS3 | 1,709                        | 1,246                 | 37.16                           |
| Pst_IS3                | 1,734                        | 1,250                 | 38.72                           |

\* Sequenced bacterial strains and library categories are summarized in Table 1 and 2

\*\* Averages were rounded to nearest integer value

\*\*\* Values include 20 nucleotides from 5' read trimming

**Table S4 - Average library insert sizes before and after read quality filtering**

| library sequenced* | % raw read pairs passing quality filtering | average insert size** in bps |                                | % decrease of average insert size |
|--------------------|--------------------------------------------|------------------------------|--------------------------------|-----------------------------------|
|                    |                                            | raw read remapping           | high quality read remapping*** |                                   |
| Bce_TS             | 85.66                                      | 654                          | 632                            | 3.36                              |
| Bce_IS1            | 86.45                                      | 669                          | 661                            | 1.20                              |
| Bce_IS3            | 71.43                                      | 1,094                        | 1,038                          | 5.12                              |
| Efa_TS             | 94.02                                      | 610                          | 597                            | 2.13                              |
| Efa_IS1            | 93.72                                      | 674                          | 668                            | 0.89                              |
| Efa_IS2            | 69.81                                      | 918                          | 877                            | 4.47                              |
| Sen_IS1            | 80.74                                      | 726                          | 713                            | 1.79                              |
| Sen_IS2            | 50.09                                      | 978                          | 915                            | 6.44                              |
| Pst_TS             | 75.50                                      | 673                          | 647                            | 3.86                              |
| Pst_IS1            | 71.22                                      | 714                          | 698                            | 2.24                              |
| Pst_IS3            | 40.10                                      | 1,250                        | 1,121                          | 10.32                             |
| Mlu_TS             | 75.42                                      | 626                          | 604                            | 3.51                              |
| Mlu_IS1            | 70.89                                      | 675                          | 664                            | 1.63                              |
| Mlu_IS3            | 34.81                                      | 1,255                        | 1,107                          | 11.79                             |

\* Sequenced bacterial strains and library categories are summarized in Table 1 and 2

\*\* Averages were rounded to nearest integer value. Values include 20 nucleotides from 5' read trimming.

\*\*\* Read pairs are defined to be of high quality, if at least 80% of each read's nucleotides have a Phred quality score  $\geq 20$ .

**Table S5 – Relative assembly scores for factor sequencing depth  
(SPAdes assemblies)**

| quality metric    | sequencing depth | genome* |         |         |
|-------------------|------------------|---------|---------|---------|
|                   |                  | Bce     | Efa     | Pst     |
| corrected<br>NG50 | 45               | 0.85    | 0.94    | 0.99    |
|                   | 90               | 1       | 1       | 1       |
|                   | <i>max**</i>     | 485,517 | 393,034 | 213,539 |
| NGA50             | 45               | 0.78    | 0.96    | 0.96    |
|                   | 90               | 1       | 1       | 1       |
|                   | <i>max**</i>     | 821,716 | 424,647 | 242,739 |

\* Relative assembly scores were rounded to the second decimal.

\*\* *max* refers to the absolute value in nucleotides for the maximal relative assembly score of the column. *max* values represent averages that were rounded to nearest integer.

**Table S6 – Relative assembly scores for factor library category  
(ABYSS assemblies)**

| quality metric    | insert size  | genome* |         |         | Pst     |
|-------------------|--------------|---------|---------|---------|---------|
|                   |              | Bce     | Efa     | Sen     |         |
| corrected<br>NG50 | TS           | 0.81    | 1       | n.d.    | 0.74    |
|                   | IS1          | 0.82    | 0.99    | 0.96    | 0.69    |
|                   | IS2 or IS3   | 1       | 0.98    | 1       | 1       |
|                   | <i>max**</i> | 353,214 | 335,452 | 246,064 | 183,457 |
| NGA50             | TS           | 0.86    | 0.85    | n.d.    | 0.98    |
|                   | IS1          | 0.83    | 0.87    | 0.77    | 0.95    |
|                   | IS2 or IS3   | 1       | 1       | 1       | 1       |
|                   | <i>max**</i> | 759,632 | 445,272 | 458,061 | 223,858 |

\* Relative assembly scores were rounded to the second decimal.

\*\* *max* refers to the absolute value in nucleotides for the maximal relative assembly score of the column. *max* values represent averages that were rounded to nearest integer.

**Table S7 – Relative assembly scores for factor read length  
(ABySS assemblies)**

| quality metric    | read length  | genome*        |                |                |                |
|-------------------|--------------|----------------|----------------|----------------|----------------|
|                   |              | Bce            | Efa            | Sen            | Pst            |
| corrected<br>NG50 | 100          | 0.89           | 0.78           | 0.85           | 1              |
|                   | 125          | 0.94           | 0.82           | 0.999          | 0.80           |
|                   | 150          | 0.72           | 0.91           | 0.94           | 0.75           |
|                   | 175          | 1              | 0.99           | 1              | 0.90           |
|                   | 189          | 0.75           | 1              | 0.998          | 0.86           |
|                   | <i>max**</i> | <i>360,330</i> | <i>368,221</i> | <i>251,266</i> | <i>172,209</i> |
| NGA50             | 100          | 0.74           | 0.96           | 0.80           | 0.98           |
|                   | 125          | 0.75           | 0.96           | 1              | 0.99           |
|                   | 150          | 1              | 0.94           | 0.98           | 0.97           |
|                   | 175          | 0.94           | 1              | 0.92           | 0.99           |
|                   | 189          | 0.90           | 0.96           | 0.90           | 1              |
|                   | <i>max**</i> | <i>784,943</i> | <i>418,320</i> | <i>440,832</i> | <i>221,474</i> |

\* Relative assembly scores were rounded to the second decimal. In cases where a clear distinction between maximal and non-maximal scores would no longer be possible, rounding was extended to the first decimal place capable of being differentiated.

\*\* *max* refers to the absolute value in nucleotides for the maximal relative assembly score of the column. *max* values represent averages that were rounded to nearest integer.

**Table S8 – Relative assembly scores for factor sequencing depth  
(ABySS assemblies)**

| quality metric    | sequencing depth | genome*        |                |                |
|-------------------|------------------|----------------|----------------|----------------|
|                   |                  | Bce            | Efa            | Pst            |
| corrected<br>NG50 | 45               | 0.74           | 0.70           | 0.77           |
|                   | 90               | 1              | 1              | 1              |
|                   | <i>max**</i>     | <i>355,983</i> | <i>389,866</i> | <i>167,776</i> |
| NGA50             | 45               | 0.76           | 0.90           | 0.96           |
|                   | 90               | 1              | 1              | 1              |
|                   | <i>max**</i>     | <i>775,233</i> | <i>424,126</i> | <i>223,188</i> |

\* Relative assembly scores were rounded to the second decimal.

\*\* *max* refers to the absolute value in nucleotides for the maximal relative assembly score of the column. *max* values represent averages that were rounded to nearest integer.

**Table S9 – Relative assembly scores for factor library category  
(Velvet assemblies)**

| quality metric    | insert size  | genome* |         |         |         |
|-------------------|--------------|---------|---------|---------|---------|
|                   |              | Bce     | Efa     | Sen     | Pst     |
| corrected<br>NG50 | TS           | 0.34    | 1       | n.d.    | 0.94    |
|                   | IS1          | 1       | 0.88    | 1       | 0.96    |
|                   | IS2 or IS3   | 0.35    | 0.82    | 0.94    | 1       |
|                   | <i>max**</i> | 567,563 | 300,545 | 231,909 | 206,284 |
| NGA50             | TS           | 0.30    | 1       | n.d.    | 0.97    |
|                   | IS1          | 1       | 0.85    | 1       | 0.97    |
|                   | IS2 or IS3   | 0.37    | 0.87    | 0.92    | 1       |
|                   | <i>max**</i> | 757,995 | 328,125 | 390,653 | 232,915 |

\* Relative assembly scores were rounded to the second decimal.

\*\* *max* refers to the absolute value in nucleotides for the maximal relative assembly score of the column. *max* values represent averages that were rounded to nearest integer.

**Table S10 – Relative assembly scores for factor read length  
(Velvet assemblies)**

| quality metric    | read length  | genome* |         |         |         |
|-------------------|--------------|---------|---------|---------|---------|
|                   |              | Bce     | Efa     | Sen     | Pst     |
| corrected<br>NG50 | 100          | 0.66    | 0.69    | 0.80    | 1       |
|                   | 125          | 0.82    | 0.69    | 0.83    | 0.91    |
|                   | 150          | 0.96    | 0.85    | 0.83    | 0.94    |
|                   | 175          | 1       | 1       | 1       | 0.95    |
|                   | 189          | 0.98    | 0.95    | 0.86    | 0.89    |
|                   | <i>max**</i> | 373,968 | 323,927 | 259,132 | 212,449 |
| NGA50             | 100          | 0.78    | 0.81    | 1       | 1       |
|                   | 125          | 0.87    | 0.87    | 0.99    | 0.97    |
|                   | 150          | 1       | 0.84    | 0.95    | 0.96    |
|                   | 175          | 0.89    | 1       | 0.81    | 0.91    |
|                   | 189          | 0.75    | 0.99    | 0.84    | 0.93    |
|                   | <i>max**</i> | 490,929 | 379,037 | 408,297 | 110,392 |

\* Relative assembly scores were rounded to the second decimal. In cases where a clear distinction between maximal and non-maximal scores would no longer be possible, rounding was extended to the first decimal place capable of being differentiated.

\*\* *max* refers to the absolute value in nucleotides for the maximal relative assembly score of the column. *max* values represent averages that were rounded to nearest integer.

**Table S11 – Relative assembly scores for factor sequencing depth  
(Velvet assemblies)**

| quality metric    | sequencing depth | genome* |         |         |
|-------------------|------------------|---------|---------|---------|
|                   |                  | Bce     | Efa     | Pst     |
| corrected<br>NG50 | 45               | 0.70    | 0.59    | 0.87    |
|                   | 90               | 1       | 1       | 1       |
|                   | <i>max**</i>     | 375,042 | 341,912 | 213,284 |
| NGA50             | 45               | 0.73    | 0.61    | 0.90    |
|                   | 90               | 1       | 1       | 1       |
|                   | <i>max**</i>     | 487,795 | 425,447 | 240,426 |

\* Relative assembly scores were rounded to the second decimal.

\*\* *max* refers to the absolute value in nucleotides for the maximal relative assembly score of the column. *max* values represent averages that were rounded to nearest integer.

**Table S12 – Relative assembly scores for factor library category  
(Edena assemblies)**

| quality metric    | insert size  | genome* |         |         |         |
|-------------------|--------------|---------|---------|---------|---------|
|                   |              | Bce     | Efa     | Sen     | Pst     |
| corrected<br>NG50 | TS           | 0.20    | 1       | n.d.    | 1       |
|                   | IS1          | 1       | 0.99    | 1       | 0.96    |
|                   | IS2 or IS3   | 0.33    | 0.77    | 0.77    | 0.75    |
|                   | <i>max**</i> | 551,178 | 296,040 | 209,880 | 171,430 |
| NGA50             | TS           | 0.21    | 1       | n.d.    | 1       |
|                   | IS1          | 1       | 0.998   | 1       | 0.98    |
|                   | IS2 or IS3   | 0.36    | 0.78    | 0.74    | 0.75    |
|                   | <i>max**</i> | 560,150 | 297,278 | 234,630 | 171,623 |

\* Relative assembly scores were rounded to the second decimal. In cases where a clear distinction between maximal and non-maximal scores would no longer be possible, rounding was extended to the first decimal place capable of being differentiated.

\*\* *max* refers to the absolute value in nucleotides for the maximal relative assembly score of the column. *max* values represent averages that were rounded to nearest integer.

**Table S13 – Relative assembly scores for factor read length  
(Edena assemblies)**

| quality metric    | read length  | genome         |                |                |                |
|-------------------|--------------|----------------|----------------|----------------|----------------|
|                   |              | Bce            | Efa            | Sen            | Pst            |
| corrected<br>NG50 | 100          | 0.74           | 0.74           | 0.92           | 1              |
|                   | 125          | 0.99           | 0.83           | 0.98           | 0.99           |
|                   | 150          | 0.98           | 0.87           | 0.98           | 0.95           |
|                   | 175          | 0.98           | 1              | 1              | 0.81           |
|                   | 189          | 1              | 0.87           | 0.87           | 0.72           |
|                   | <i>max**</i> | <i>299,749</i> | <i>317,133</i> | <i>195,108</i> | <i>173,950</i> |
| NGA50             | 100          | 0.67           | 0.74           | 0.87           | 0.999          |
|                   | 125          | 0.91           | 0.83           | 0.95           | 1              |
|                   | 150          | 0.90           | 0.87           | 0.98           | 0.94           |
|                   | 175          | 1              | 1              | 1              | 0.81           |
|                   | 189          | 0.97           | 0.87           | 0.80           | 0.72           |
|                   | <i>max**</i> | <i>329,643</i> | <i>318,278</i> | <i>221,295</i> | <i>174,717</i> |

\* Relative assembly scores were rounded to the second decimal. In cases where a clear distinction between maximal and non-maximal scores would no longer be possible, rounding was extended to the first decimal place capable of being differentiated.

\*\* *max* refers to the absolute value in nucleotides for the maximal relative assembly score of the column. *max* values represent averages that were rounded to nearest integer.

**Table S14 – Relative assembly scores of factor sequencing depth  
(Edena assemblies)**

| quality metric    | sequencing depth | genome*        |                |                |
|-------------------|------------------|----------------|----------------|----------------|
|                   |                  | Bce            | Efa            | Pst            |
| corrected<br>NG50 | 45               | 0.58           | 0.57           | 0.57           |
|                   | 90               | 1              | 1              | 1              |
|                   | <i>max**</i>     | <i>355,661</i> | <i>348,269</i> | <i>197,405</i> |
| NGA50             | 45               | 0.57           | 0.58           | 0.57           |
|                   | 90               | 1              | 1              | 1              |
|                   | <i>max**</i>     | <i>374,324</i> | <i>348,271</i> | <i>198,796</i> |

\* Relative assembly scores were rounded to the second decimal.

\*\* *max* refers to the absolute value in nucleotides for the maximal relative assembly score of the column. *max* values represent averages that were rounded to nearest integer.
